# Supplementary material for: Predictors of Chemosensitivity in Triple Negative Breast Cancer: An Integrated Genomic Analysis
Source: PubMed Central journal article supplement (PMC5154510; doi:10.1371/journal.pmed.1002193), 2016-12-13
Supplement: pmed.1002193.s001.pdf [file pmed.1002193.s001.pdf]

STROBE Statement—Checklist of items that should be included in reports of *cohort studies*

|                              | Item No | Recommendation                                                                                                                                                                       | Reference in Manuscript                                                                 |
|------------------------------|---------|--------------------------------------------------------------------------------------------------------------------------------------------------------------------------------------|-----------------------------------------------------------------------------------------|
| <b>Title and abstract</b>    | 1       | (a) Indicate the study's design with a commonly used term in the title or the abstract                                                                                               | An integrated genomic analysis...                                                       |
|                              |         | (b) Provide in the abstract an informative and balanced summary of what was done and what was found                                                                                  | Structured abstract<br>Author summary                                                   |
| <b>Introduction</b>          |         |                                                                                                                                                                                      |                                                                                         |
| Background/rationale         | 2       | Explain the scientific background and rationale for the investigation being reported                                                                                                 | Introduction, paragraphs 1-3                                                            |
| Objectives                   | 3       | State specific objectives, including any prespecified hypotheses                                                                                                                     | Introduction, paragraph 4                                                               |
| <b>Methods</b>               |         |                                                                                                                                                                                      |                                                                                         |
| Study design                 | 4       | Present key elements of study design early in the paper                                                                                                                              | Introduction/paragraph 4, Methods/sample collection and datasets                        |
| Setting                      | 5       | Describe the setting, locations, and relevant dates, including periods of recruitment, exposure, follow-up, and data collection                                                      | Methods, MDACC cohort                                                                   |
| Participants                 | 6       | (a) Give the eligibility criteria, and the sources and methods of selection of participants. Describe methods of follow-up                                                           | Described in previous study where the samples were collected; reference provided on p 8 |
|                              |         | (b) For matched studies, give matching criteria and number of exposed and unexposed                                                                                                  | Criteria for selecting TNBC cases from other cohorts provided (Fig. 1, p. 8-9)          |
| Variables                    | 7       | Clearly define all outcomes, exposures, predictors, potential confounders, and effect modifiers. Give diagnostic criteria, if applicable                                             | Outcomes clearly defined: pCR for neoadjuvant, Overall Survival for adjuvant            |
| Data sources/<br>measurement | 8*      | For each variable of interest, give sources of data and details of methods of assessment (measurement). Describe comparability of assessment methods if there is more than one group | Details for sequencing and analysis provided in methods                                 |
| Bias                         | 9       | Describe any efforts to address potential sources of bias                                                                                                                            | Validation in independent cohorts (TCGA and METABRIC)                                   |
| Study size                   | 10      | Explain how the study size was arrived at                                                                                                                                            | Explained on p.8 under MDACC cohort                                                     |
| Quantitative variables       | 11      | Explain how quantitative variables were handled in the analyses. If applicable, describe which groupings were chosen and why                                                         | Explained throughout (clonal mutation burden, BRCA-deficient status)                    |
| Statistical methods          | 12      | (a) Describe all statistical methods, including those used to control for confounding                                                                                                | Described in methods                                                                    |
|                              |         | (b) Describe any methods used to examine subgroups and                                                                                                                               | Described methods for                                                                   |

|                   |     |                                                                                                                                                                                                              |                                                                   |
|-------------------|-----|--------------------------------------------------------------------------------------------------------------------------------------------------------------------------------------------------------------|-------------------------------------------------------------------|
|                   |     | interactions                                                                                                                                                                                                 | assessing association between BRCA-D status and OS                |
|                   |     | (c) Explain how missing data were addressed                                                                                                                                                                  | Only cases with complete data for the given analysis were used    |
|                   |     | (d) If applicable, explain how loss to follow-up was addressed                                                                                                                                               | Standard censoring in survival analysis                           |
|                   |     | (e) Describe any sensitivity analyses                                                                                                                                                                        | None done                                                         |
| <b>Results</b>    |     |                                                                                                                                                                                                              |                                                                   |
| Participants      | 13* | (a) Report numbers of individuals at each stage of study—eg numbers potentially eligible, examined for eligibility, confirmed eligible, included in the study, completing follow-up, and analysed            | P. 8 and Fig. 1                                                   |
|                   |     | (b) Give reasons for non-participation at each stage                                                                                                                                                         | P. 8 and Fig. 1                                                   |
|                   |     | (c) Consider use of a flow diagram                                                                                                                                                                           | Fig 1 for TCGA cohort                                             |
| Descriptive data  | 14* | (a) Give characteristics of study participants (eg demographic, clinical, social) and information on exposures and potential confounders                                                                     | S1 Table                                                          |
|                   |     | (b) Indicate number of participants with missing data for each variable of interest                                                                                                                          | S3 Table                                                          |
|                   |     | (c) Summarise follow-up time (eg, average and total amount)                                                                                                                                                  | For TCGA and METABRIC summarized in original publications         |
| Outcome data      | 15* | Report numbers of outcome events or summary measures over time                                                                                                                                               | Figs 3, 4                                                         |
| Main results      | 16  | (a) Give unadjusted estimates and, if applicable, confounder-adjusted estimates and their precision (eg, 95% confidence interval). Make clear which confounders were adjusted for and why they were included | Unadjusted and adjusted p-values for pathway analysis in S2 Table |
|                   |     | (b) Report category boundaries when continuous variables were categorized                                                                                                                                    | P 19 for BRCA-D signature                                         |
|                   |     | (c) If relevant, consider translating estimates of relative risk into absolute risk for a meaningful time period                                                                                             |                                                                   |
| Other analyses    | 17  | Report other analyses done—eg analyses of subgroups and interactions, and sensitivity analyses                                                                                                               | Reported in results (BRCA-D analysis)                             |
| <b>Discussion</b> |     |                                                                                                                                                                                                              |                                                                   |
| Key results       | 18  | Summarise key results with reference to study objectives                                                                                                                                                     | Throughout discussion                                             |
| Limitations       | 19  | Discuss limitations of the study, taking into account sources of potential bias or imprecision. Discuss both direction and magnitude of any potential bias                                                   | End of discussion                                                 |
| Interpretation    | 20  | Give a cautious overall interpretation of results considering objectives, limitations, multiplicity of analyses, results from similar studies, and other relevant evidence                                   | Throughout discussion                                             |
| Generalisability  | 21  | Discuss the generalisability (external validity) of the study                                                                                                                                                | Need for additional                                               |

**Other information**

|         |    |                                                                                                                                                               |                             |
|---------|----|---------------------------------------------------------------------------------------------------------------------------------------------------------------|-----------------------------|
| Funding | 22 | Give the source of funding and the role of the funders for the present study and, if applicable, for the original study on which the present article is based | Provided in Acknowledgments |
|---------|----|---------------------------------------------------------------------------------------------------------------------------------------------------------------|-----------------------------|

\*Give information separately for exposed and unexposed groups.

**Note:** An Explanation and Elaboration article discusses each checklist item and gives methodological background and published examples of transparent reporting. The STROBE checklist is best used in conjunction with this article (freely available on the Web sites of PLoS Medicine at <http://www.plosmedicine.org/>, Annals of Internal Medicine at <http://www.annals.org/>, and Epidemiology at <http://www.epidem.com/>). Information on the STROBE Initiative is available at <http://www.strobe-statement.org>.
